# Supplementary material for: No evidence that presence of sexually transmitted infection selects for reduced mating rate in the two spot ladybird, Adalia bipunctata
Source: PeerJ. 2015 Aug 4;3:e1148. doi: 10.7717/peerj.1148 (PMC4540017; doi:10.7717/peerj.1148)
Supplement: Supplemental Information 1 — Data set: Do female beetles from populations that carry the STI show lower mating rates and a greater likelihood of rejecting mating? [file peerj-03-1148-s001.xlsx]

## Sheet: Rejection
Stockholm										Nassjo
Block/Day	♀	♂	Mating Duration (Hr/mins)	Mating Duration (mins)	Rejection	Rejection Duration (mins)	Rejection attempts	♂ on ♀	Pair Mated	Block/Day	♀	♂	Duration (Hr/mins)	Mating Duration (mins)	Rejection	Rejection Duration (mins)	Rejection attempts	♂ on ♀	Pair Mated
B1/D1	SF1	SM2	2hr 50mins	170	Y	0.42	1	Y	Y	B1/D1	NF1	NM6	3hr 4mins	184	Y	0.4	1	Y	Y
	SF2	SM6	3hr 53	233	N	0	0	N	Y		NF2	NM3	1hr 51mins	111	Y	1.05	1	Y	Y
	SF3	SM4	1hr 37mins	97	N	0	0	N	Y		NF3	NM4	-	0	N	0	0	N	N
	SF4	SM5	1hr 52mins	112	Y	2.47	2	Y	Y		NF4	NM5	3hr 4mins	184	N	0	0	N	Y
	SF5	SM1	1hr 41mins	101	Y	15.57	1	Y	Y		NF5	NM1	-	0	Y	14.05	2	Y	N
D2	SF1	SM6	1hr 28mins	88	Y	7.55	1	Y	Y	D2	NF1	NM3	2hr 30mins	150	Y	5.57	1	Y	Y
	SF2	SM4	-	0	Y	8.38	2	N	N		NF2	NM4	-	0	N	0	0	N	N
	SF3	SM5	1hr 50mins	110	Y	10.75	1	Y	Y		NF3	NM5	-	0	Y	12.65	2	Y	N
	SF4	SM1	-	0	Y	21.07	2	N	N		NF4	NM1	-	0	Y	17.75	2	Y	N
	SF5	SM2	-	0	Y	0.42	2	N	N		NF5	NM6	2hr 57mins	177	Y	6.83	1	Y	Y
D3	SF1	SM4	2hr 18mins	138	Y	6.75	1	Y	Y	D3	NF1	NM4	-	0	Y	0	0	N	N
	SF2	SM5	1hr 19mins	79	Y	4.88	1	Y	Y		NF2	NM5	-	0	Y	20.57	3	Y	N
	SF3	SM1	3hr 36mins	216	Y	0.8	1	Y	Y		NF3	NM1	-	0	Y	27.73	1	Y	N
	SF4	SM2	-	0	N	28.5	1	Y	Y		NF4	NM6	1hr 58mins	118	Y	15.4	1	Y	N
	SF5	SM6	1hr 26mins	86	Y	17.48	2	Y	Y		NF5	NM3	-	0	Y	26.78	1	Y	Y
D4	SF1	SM5	1hr 42mins	102	N	0	0	N	Y	D4	NF1	NM5	-	0	Y	2.17	2	N	N
	SF2	SM1	-	0	Y	2.43	3	N	N		NF2	NM1	-	0	N	0	0	N	N
	SF3	SM2	2hr 6mins	126	Y	0.4	1	Y	Y		NF3	NM6	3hr 55mins	235	Y	26.38	1	Y	Y
	SF4	SM6	1hr 45mins	105	Y	7.37	1	Y	Y		NF4	NM3	-	0	Y	25.98	1	Y	N
	SF5	SM4	1hr 30mins	90	Y	4.82	1	Y	Y		NF5	NM4	-	0	Y	0.47	1	N	N
D5	SF1	SM1	2hr 50mins	170	Y	0.4	1	Y	Y	D5	NF1	NM1	-	0	Y	1.3	1	N	N
	SF2	SM2	-	0	Y	4.65	1	N	N		NF2	NM6	1hr 53mins	113	Y	2.05	1	Y	Y
	SF3	SM6	1hr 40mins	100	Y	1.22	1	Y	Y		NF3	NM3	3hr 20mins	200	Y	0.57	1	Y	Y
	SF4	SM4	-	0	N	0	0	N	N		NF4	NM4	-	0	Y	2.98	1	N	N
	SF5	SM5	1hr 12mins	72	Y	5.2	1	Y	Y		NF5	NM5	-	0	Y	13.78	1	Y	N
B2/D1	SF8	SM10	2hr 5mins	125	Y	2.05	1	Y	Y	B2/D1	NF8	NM9	1hr 46mins	106	Y	17.57	1	Y	Y
	SF10	SM11	3hr 26mins	206	Y	9.87	1	Y	Y		NF9	NM10	1hr 47mins	107	Y	16.78	1	Y	Y
	SF11	SM14	-	0	Y	17.17	1	Y	N		NF10	NM12	1hr 48mins	108	Y	13.6	1	Y	Y
	SF12	SM9	-	0	Y	23.15	1	Y	N		NF12	NM13	-	0	Y	6.15	1	N	N
	SF13	SM8	4hr 7mins	247	Y	9.5	1	Y	Y		NF13	NM8	1hr 40mins	100	Y	14.18	1	Y	Y
D2	SF8	SM11	1hr 17mins	77	Y	0	1	Y	Y	D2	NF8	NM10	-	0	N	0	0	N	N
	SF10	SM14	4hr 49mins	289	Y	7.25	1	Y	Y		NF9	NM12	1hr 50mins	100	Y	4.28	1	Y	Y
	SF11	SM9	1hr 58mins	118	Y	22.47	1	Y	Y		NF10	NM13	1hr 19mins	79	Y	3.97	1	Y	Y
	SF12	SM8	1hr 49mins	109	Y	4.93	1	Y	Y		NF12	NM8	1hr 57mins	117	Y	3.25	1	Y	Y
	SF13	SM10	1hr 47mins	107	Y	7.37	1	Y	Y		NF13	NM9	-	0	Y	12	2	Y	N
D3	SF8	SM14	1hr 37mins	97	Y	6	2	Y	Y	D3	NF8	NM12	2hr 1min	121	Y	6.78	1	Y	Y
	SF10	SM9	1hr 49mins	109	Y	3.13	1	Y	Y		NF9	NM13	-	0	N	0	0	N	N
	SF11	SM8	-	0	N	0	0	N	N		NF10	NM8	1hr 23mins	83	Y	9.48	1	Y	Y
	SF12	SM10	-	0	N	0	0	N	N		NF12	NM9	-	0	Y	11.55	1	Y	N
	SF13	SM11	-	0	Y	0.03	1	N	N		NF13	NM10	-	0	N	0	0	N	N
D4	SF8	SM9	-	0	Y	28.85	1	Y	N	D4	NF8	NM13	-	0	N	0	0	N	N
	SF10	SM8	-	0	N	0	0	N	N		NF9	NM8	1hr 38mins	98	Y	4.52	1	Y	Y
	SF11	SM10	1hr 26mins	86	Y	9.9	1	Y	Y		NF10	NM9	-	0	N	0	0	N	N
	SF12	SM11	-	0	N	0	0	N	N		NF12	NM10	-	0	N	0	0	N	N
	SF13	SM14	-	0	Y	9.83	3	Y	N		NF13	NM12	1hr 52mins	112	Y	6.3	1	Y	Y
D5	SF8	SM8	3hr 28mins	208	Y	10.2	1	Y	Y	D5	NF8	NM8	1hr 55mins	55	Y	6.45	1	Y	Y
	SF10	SM10	1hr 50mins	110	Y	3.18	1	Y	Y		NF9	NM9	1hr 37mins	97	Y	11.53	1	Y	Y
	SF11	SM11	1hr 41mins	101	Y	19.92	1	Y	Y		NF10	NM10	-	0	N	0	0	N	N
	SF12	SM14	3hr 23mins	203	Y	10.82	1	Y	Y		NF12	NM12	1hr 48mins	108	Y	14.65	1	Y	Y
	SF13	SM9	1hr 43mins	103	Y	3.22	1	Y	Y		NF13	NM13	-	0	N	0	0	N	N
B3/D1	SF15	SM16	2hr 24mins	144	Y	0.28	1	Y	Y	B3/D1	NF15	NM16	2hr 7mins	127	Y	1.65	1	Y	Y
	SF16	SM17	2hr 15mins	135	Y	0.92	1	Y	Y		NF16	NM20	4hr 8mins	248	Y	0.65	1	Y	Y
	SF17	SM18	3hr 58mins	238	Y	3.78	1	Y	Y		NF17	NM18	4hr 16mins	256	Y	6.3	1	Y	Y
	SF18	SM19	1hr 14mins	74	Y	3.12	1	Y	Y		NF18	NM19	2hr	120	Y	5.58	1	Y	Y
	SF19	SM15	1hr 59mins	119	Y	3.13	1	Y	Y		NF19	NM15	1hr 42mins	102	Y	18.7	1	Y	Y
D2	SF15	SM17	1hr 19mins	79	Y	5.23	1	Y	Y	D2	NF15	NM20	4hr 11mins	251	Y	3.27	1	Y	Y
	SF16	SM18	2hr 6mins	126	Y	5.17	1	Y	Y		NF16	NM18	-	0	N	0	0	N	N
	SF17	SM19	-	0	N	0	0	N	N		NF17	NM19	5hr 11mins	311	Y	2.22	1	Y	Y
	SF18	SM15	1hr 43mins	103	Y	8.53	1	Y	Y		NF18	NM15	1hr 6mins	66	Y	1.22	1	Y	Y
	SF19	SM16	1hr 49mins	109	Y	0.75	1	Y	Y		NF19	NM16	-	0	N	0	0	N	N
D3	SF15	SM18	2hr 20mins	140	Y	5.02	1	Y	T	D3	NF15	NM18	1hr 32mins	92	Y	17.82	1	Y	Y
	SF16	SM19	-	0	Y	21.93	1	N	N		NF16	NM19	-	0	N	0	0	N	N
	SF17	SM15	1hr 46mins	106	Y	2.02	1	Y	Y		NF17	NM15	1hr 46mins	106	Y	6.73	1	Y	Y
	SF18	SM16	1hr 45mins	105	Y	5.28	1	Y	Y		NF18	NM16	4hr 13mins	253	N	0	0	N	Y
	SF19	SM17	2hr 6mins	126	Y	12.15	1	Y	Y		NF19	NM20	2hr 58mins	178	Y	17.28	1	Y	Y
D4	SF15	SM19	-	0	N	0	0	N	N	D4	NF15	NM19	2hr 15mins	135	Y	16.08	1	Y	Y
	SF16	SM15	2hr	120	Y	0	0	Y	Y		NF16	NM15	-	0	Y	1.58	1	N	N
	SF17	SM16	2hr 33mins	153	Y	0.88	1	Y	Y		NF17	NM16	1hr 37mins	97	Y	4.18	1	Y	Y
	SF18	SM17	2hr 11mins	131	N	0	0	N	Y		NF18	NM20	3hr 41mins	221	Y	2	1	Y	Y
	SF19	SM18	-	0	Y	24.13	1	Y	N		NF19	NM18	2hr 19mins	139	Y	8.57	1	Y	Y
D5	SF15	SM15	2hr 17mins	137	Y	5.2	1	Y	Y	D5	NF15	NM15	-	0	Y	5.07	1	N	N
	SF16	SM16	1hr 44mins	104	Y	8.35	1	Y	Y		NF16	NM16	-	0	Y	2.32	2	N	N
	SF17	SM17	1hr 13mins	73	N	0	0	N	Y		NF17	NM20	3hr 48mins	228	Y	0.78	1	Y	Y
	SF18	SM18	2hr 10mins	130	Y	17.93	1	Y	Y		NF18	NM18	1hr 26mins	86	Y	5.73	1	Y	Y
	SF19	SM19	-	0	Y	0.75	1	N	N		NF19	NM19	-	0	Y	15.88	2	N	N
B4/D1	SF22	SM23	2hr 1mins	121	Y	2.9	1	Y	Y	B4/D1	NF22	NM23	3hr 11mins	191	Y	5.78	1	Y	Y
	SF23	SM24	4hr 20mins	260	Y	6.92	1	Y	Y		NF23	NM24	4hr 2mins	242	Y	1.43	1	Y	Y
	SF24	SM25	2hr 57mins	177	Y	6.83	1	Y	Y		NF24	NM25	4hr 3mins	243	Y	0.18	1	Y	Y
	SF25	SM26	2hr 13mins	133	Y	0.5	1	Y	Y		NF25	NM26	2hr 7mins	127	Y	2.48	1	Y	Y
	SF26	SM22	4hr 6mins	246	Y	3.05	1	Y	Y		NF26	NM27	4hr 15mins	255	Y	6.78	1	Y	Y
D2	SF22	SM24	-	0	N	0	0	N	N	D2	NF22	NM24	-	0	Y	5.28	2	N	N
	SF23	SM25	-	0	N	0	0	N	N		NF23	NM25	1hr 27mins	87	Y	13.78	1	Y	Y
	SF24	SM26	-	0	N	0	0	N	N		NF24	NM26	-	0	Y	21.02	1	Y	N
	SF25	SM22	-	0	Y	6.2	1	Y	Y		NF25	NM27	1hr 48mins	108	Y	2.83	1	Y	Y
	SF26	SM23	-	0	Y	17.67	1	Y	N		NF26	NM23	1hr 49mins	109	Y	0.98	1	Y	Y
D3	SF22	SM25	-	0	N	0	0	N	N	D3	NF22	NM25	-	0	N	0	0	N	N
	SF23	SM26	-	0	Y	5.38	1	N	N		NF23	NM26	1hr 56mins	116	Y	9.82	2	Y	Y
	SF24	SM22	3hr 54mins	234	Y	1.85	1	Y	Y		NF24	NM27	1hr 43mins	103	Y	10.15	2	Y	Y
	SF25	SM23	-	0	N	0	0	N	N		NF25	NM23	1hr 40mins	100	Y	0.03	1	Y	Y
	SF26	SM24	-	0	N	0	0	N	N		NF26	NM24	-	0	Y	20.02	1	Y	N
D4	SF22	SM26	-	0	Y	1.45	1	N	N	D4	NF22	NM26	1hr 42mins	102	Y	4.28	1	Y	Y
	SF23	SM22	2hr 1mins	121	Y	6.73	1	Y	Y		NF23	NM27	1hr 38mins	98	Y	17.45	1	Y	Y
	SF24	SM23	-	0	Y	20.9	1	Y	N		NF24	NM23	-	0	Y	1.77	2	N	N
	SF25	SM24	2hr 36mins	156	Y	4.72	1	Y	Y		NF25	NM24	-	0	N	0	0	N	N
	SF26	SM25	-	0	N	0	0	N	N		NF26	NM25	1hr 49mins	109	Y	9.9	1	Y	Y
D5	SF22	SM22	1hr 54mins	114	Y	2.93	1	Y	Y	D5	NF22	NM27	1hr 38mins	98	Y	3.98	1	Y	Y
	SF23	SM23	-	0	Y	22.82	1	Y	N		NF23	NM23	-	0	Y	10.58	3	N	N
	SF24	SM24	-	0	N	0	0	N	N		NF24	NM24			Y	10.6	1	Y	Y
	SF25	SM25	-	0	N	0	0	N	N		NF25	NM25	1hr 35mins	95	Y	7.15	1	Y	Y
	SF26	SM26	-	0	Y	1.02	1	N	N		NF26	NM26			Y	3.75	1	Y	Y
	Stockholm		Nassjo
	Histogram	Frequency	Histogram	Frequency
	60-75	3	60-75	1
	76-90	8	76-90	4
	91-105	11	91-105	12
	106-120	12	106-120	17
	121-135	10	121-135	4
	136-150	4	136-150	2
	151-165	2	151-165	0
	166-180	3	166-180	2
	181-195	0	181-195	3
	196-210	3	196-210	1
	211-225	1	211-225	1
	226-240	3	226-240	2
	241-255	2	241-255	6
	256-270	1	256-270	1
	271-285	0	271-285	0
	286-300	1	286-300	0
	301-315	0	301-315	1
d2-5	No interaction	Interaction	Interaction
		No rejection	weak rejection	moderate	intense
Stockholm	16	5	8	15	36
Nassjo	16	1	5	20	38
